# Supplementary material for: A Phase II Study on the Use of Convalescent Plasma for the Treatment of Severe COVID-19- A Propensity Score-Matched Control Analysis
Source: PubMed Central journal article supplement (PMC8069820; doi:10.3390/microorganisms9040806), 2021-04-11

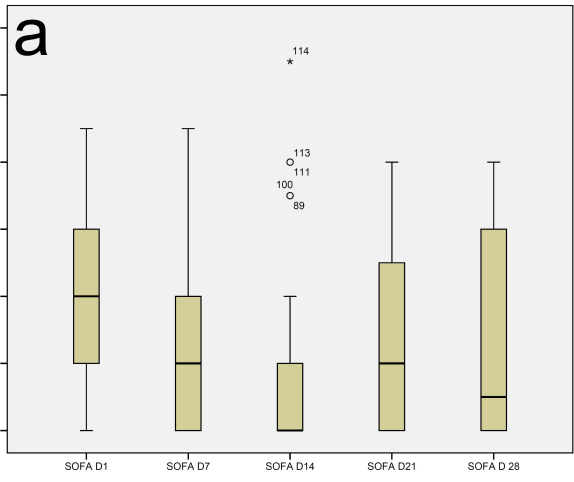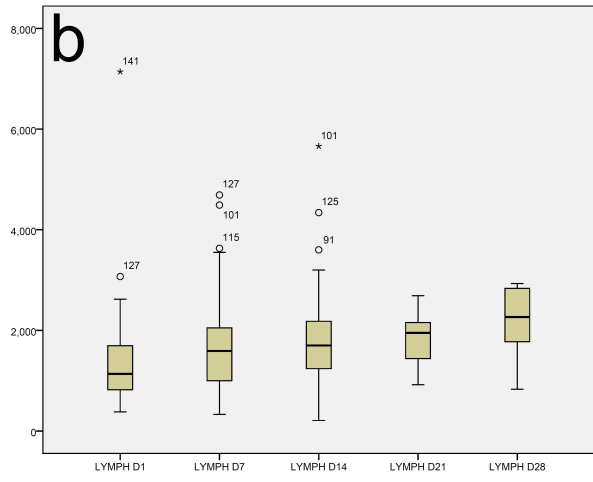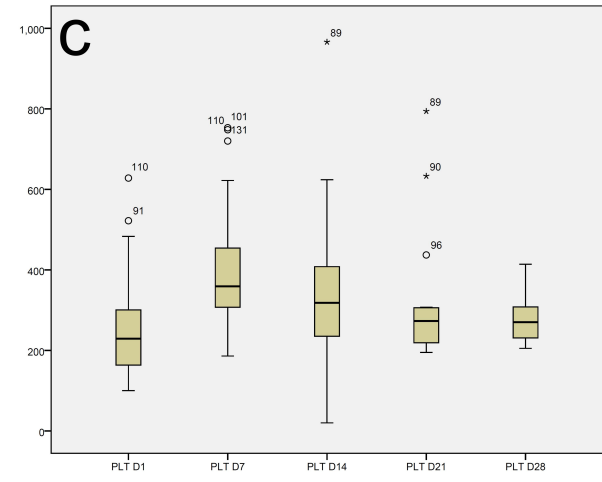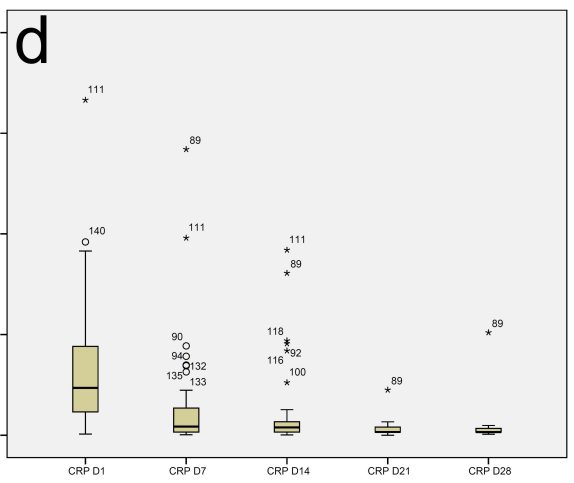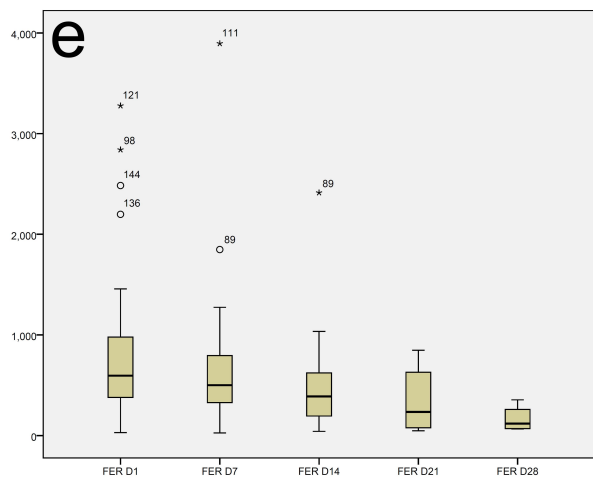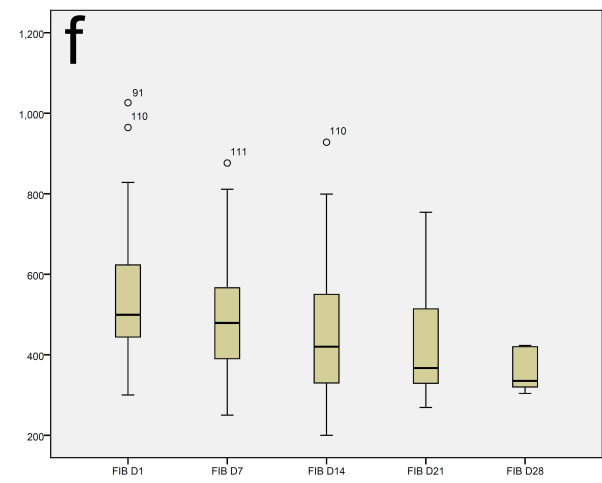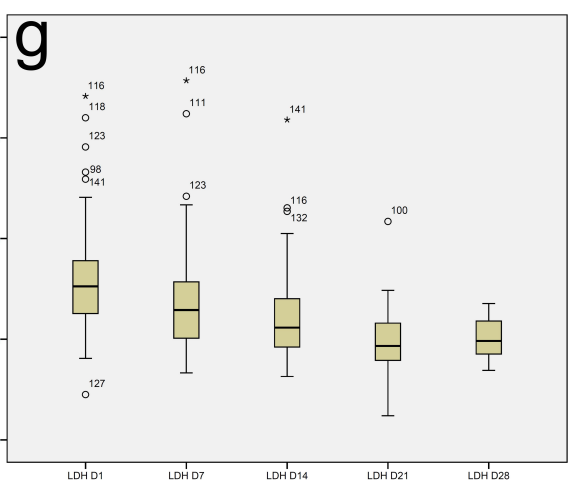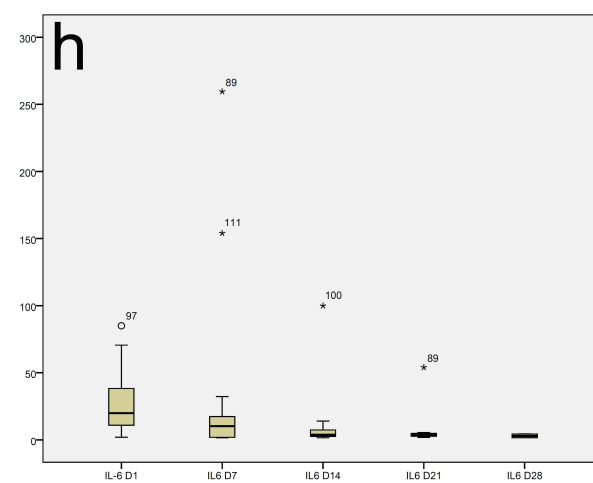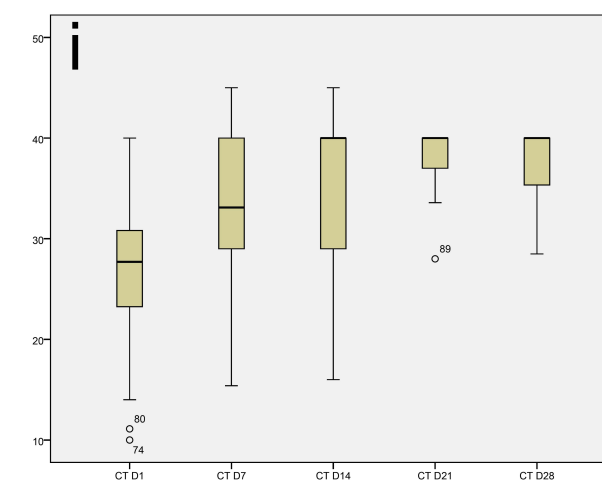

Supplement: microorganisms-09-00806-s001.pdf [file microorganisms-09-00806-s001.pdf]
